# Supplementary material for: Design, characterization, and release profile of a cannabidiol (CBD)-rich polyvinyl alcohol hydrogel
Source: Royal Society of Chemistry journal article supplement (doi:10.1039/d4ma00398e), 2024-01-01
Supplement: d4ma00398e1.pdf [file d4ma00398e1.pdf]

Supplementary results

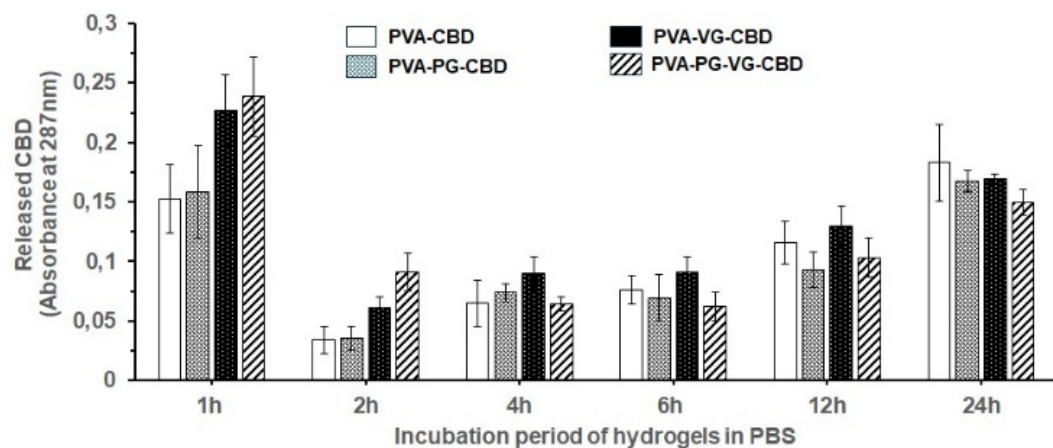

Fig.S1.

Release of CBD following hydrogel incubation in PBS

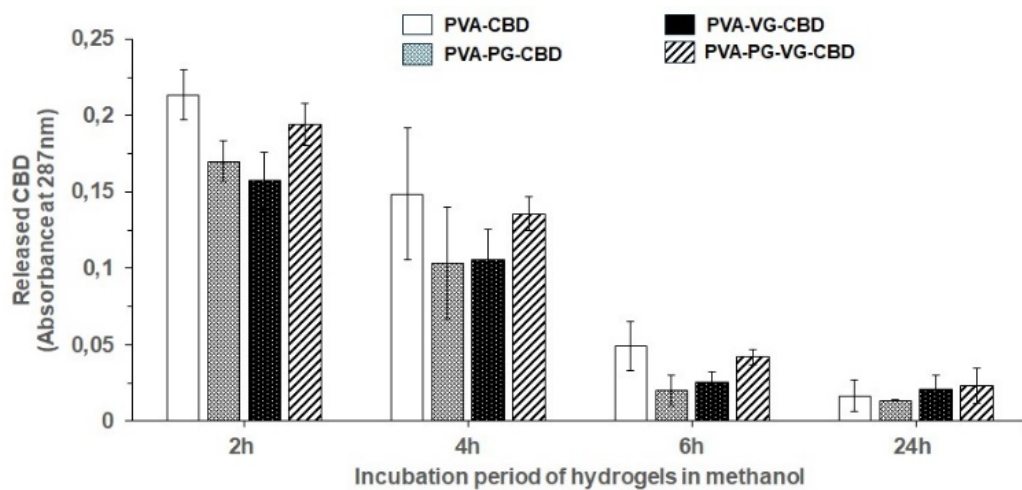

Fig. S2. Release of CBD following hydrogel incubation in methanol to collect residual CBD left after the incubation in PBS.
